# Supplementary material
Source: PubMed Central journal article supplement (PMC544065)

**1000**

**250**

**WT RW N**

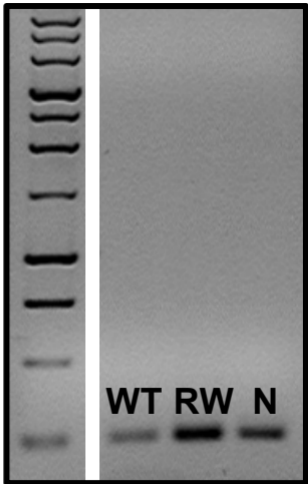

Supplement: pnas_102_1_34__1.pdf [file pnas_102_1_34__1.pdf]

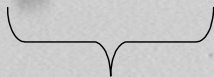

**Unbound  
PNA-FL**

**DNA**

**PNA**

**28**

**14**

**S**

**D**

**D**

**D**

**D**

**D**

**D**

**D**

**D**

**0**

**1**

**2**

**3**

**0**

**1**

**2**

**3**

Supplement: pnas_102_1_34__2.pdf [file pnas_102_1_34__2.pdf]

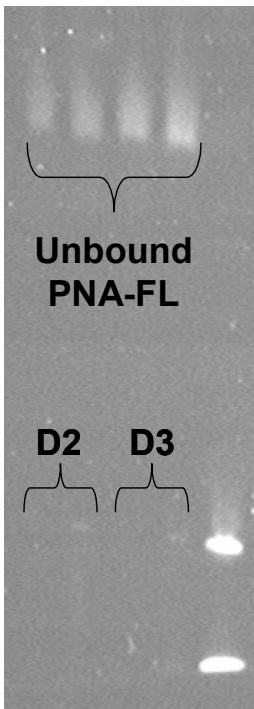

**t = 40 20 40 20 S**

Supplement: pnas_102_1_34__3.pdf [file pnas_102_1_34__3.pdf]

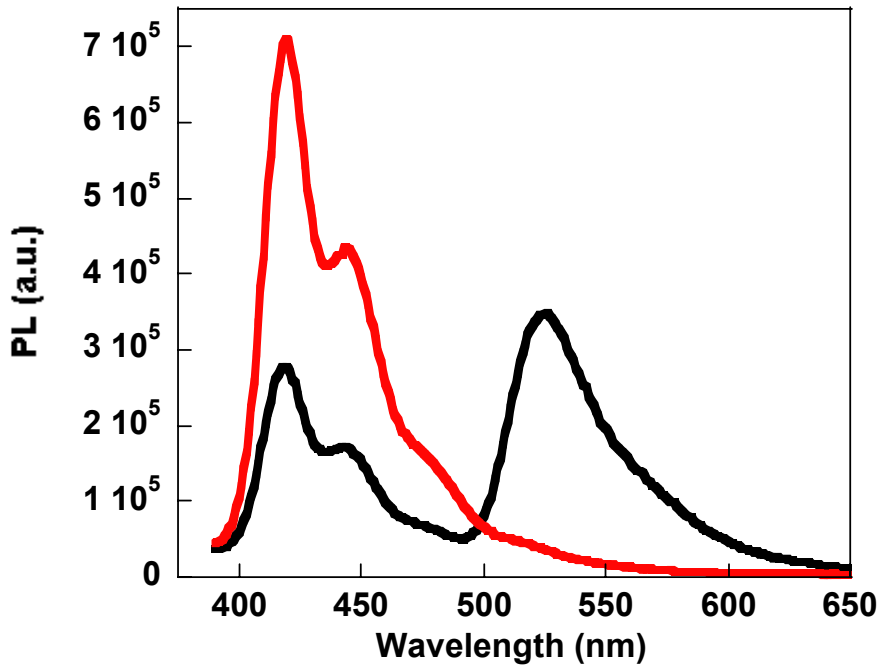

Supplement: pnas_102_1_34__4.pdf [file pnas_102_1_34__4.pdf]

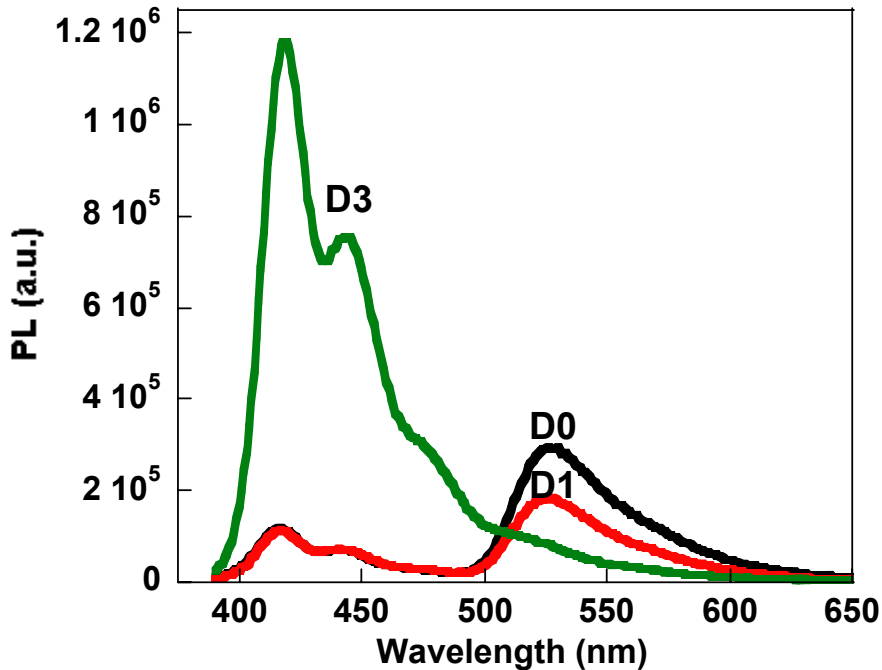

Supplement: pnas_102_1_34__5.pdf [file pnas_102_1_34__5.pdf]

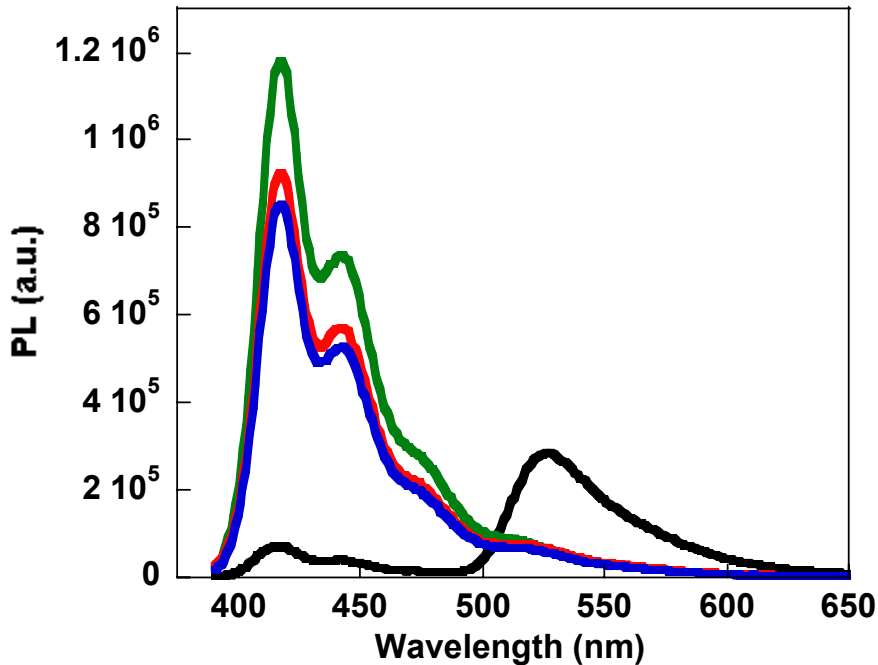

Supplement: pnas_102_1_34__6.pdf [file pnas_102_1_34__6.pdf]

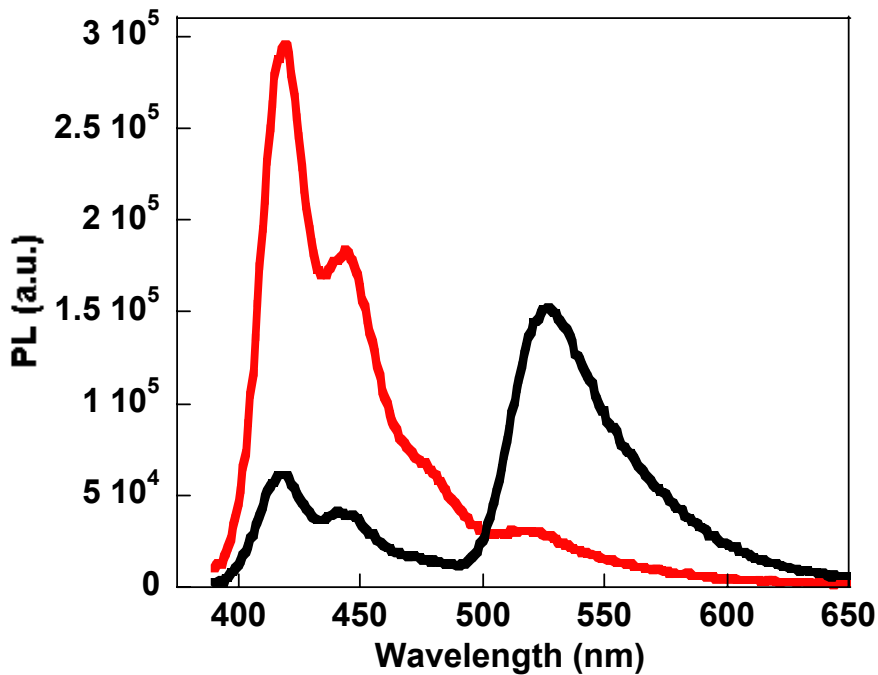

Supplement: pnas_102_1_34__7.pdf [file pnas_102_1_34__7.pdf]
